# Supplementary material
Source: MDPI journal article supplement (https://www.mdpi.com/2227-9040/10/8/343)
Supplement: s1 [file s1]

## SUPPORTING INFORMATION

An NIR emissive donor- $\pi$ -acceptor dicyanomethylene-4H-pyran derivative as a fluorescent chemosensor system towards copper (II) detection

Agata Karkosik, Artur J. Moro\* <sup>a</sup>

<sup>a</sup>*LAQV-REQUIMTE, Departamento de Química, CQFB, Universidade Nova de Lisboa, Monte de Caparica, Portugal.*

\* *E-mail: artur.moro@fct.unl.pt*

## NMR spectra

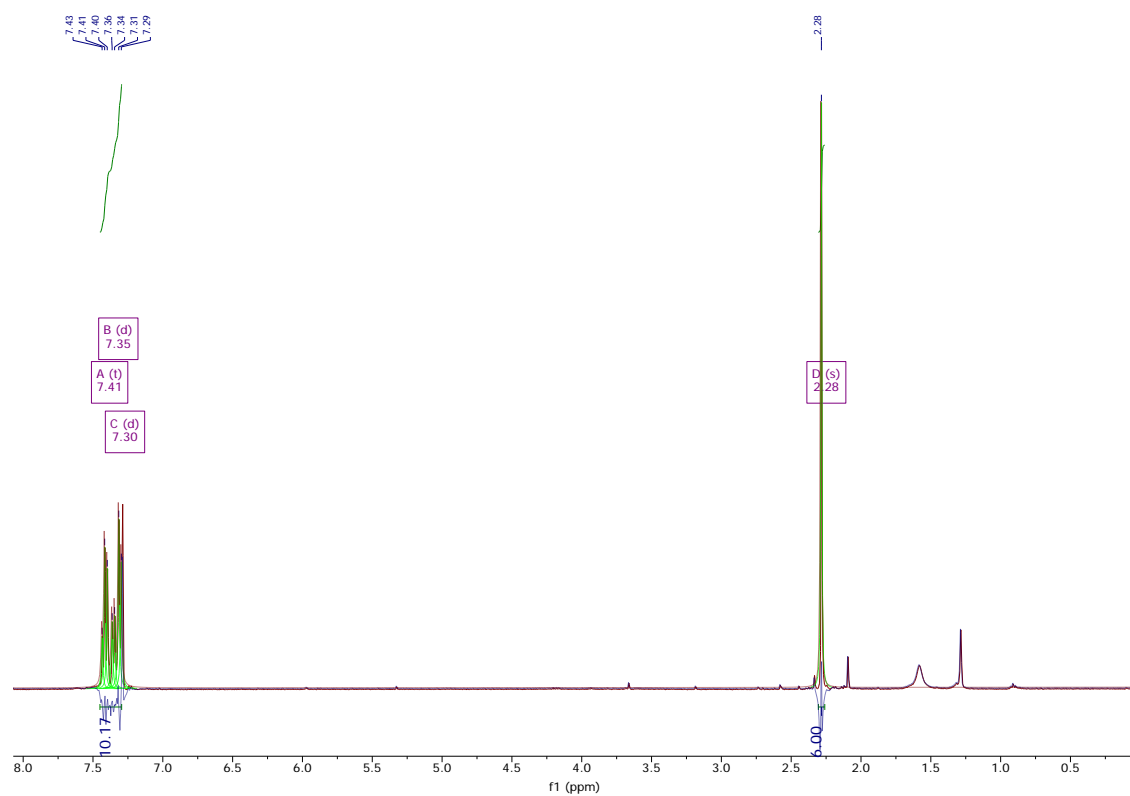

Figure S1. <sup>1</sup>H NMR spectrum of **1**.

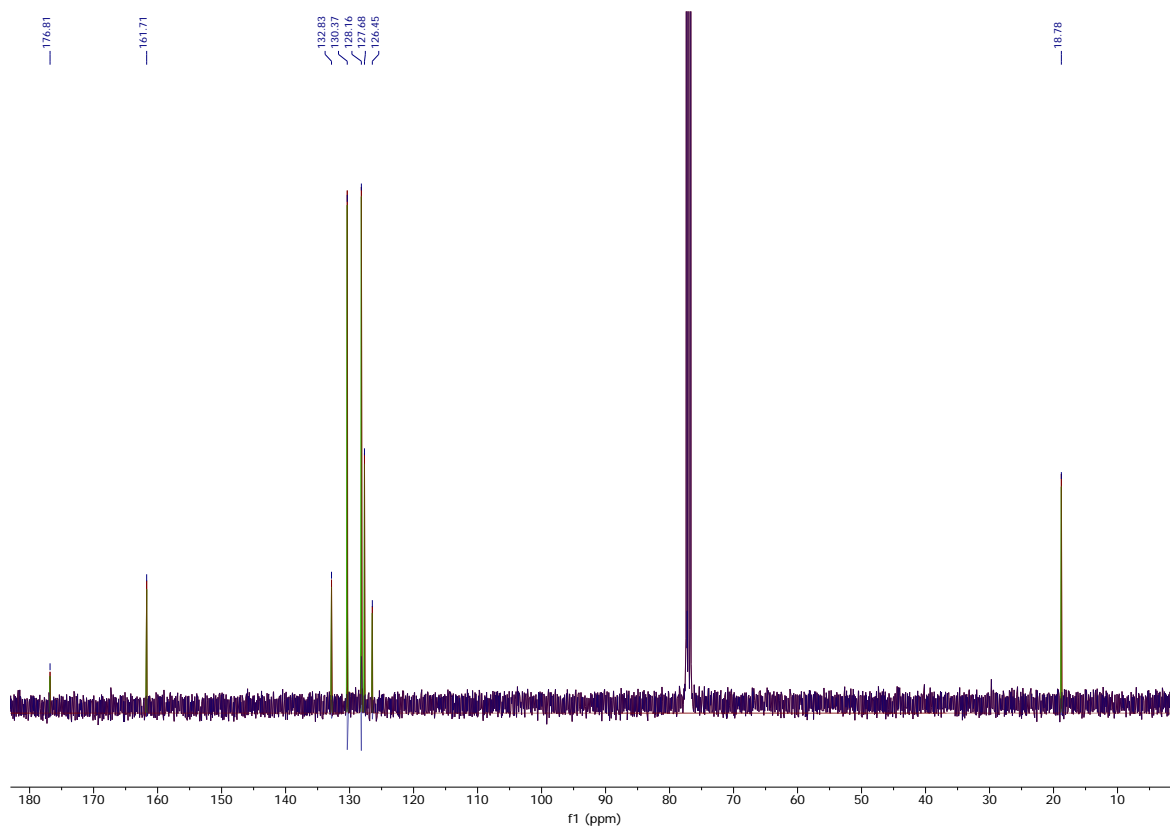

Figure S2. <sup>13</sup>C NMR spectrum of **1**.

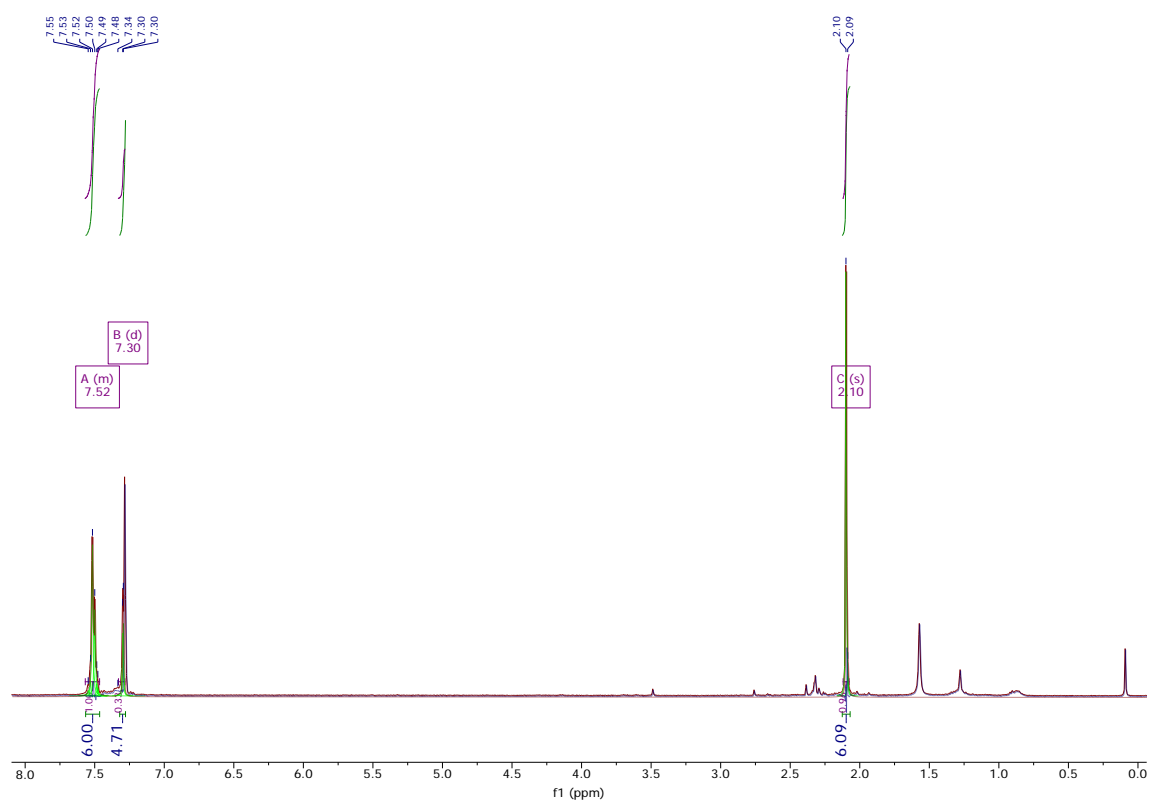

Figure S3. <sup>1</sup>H NMR spectrum of **2**.

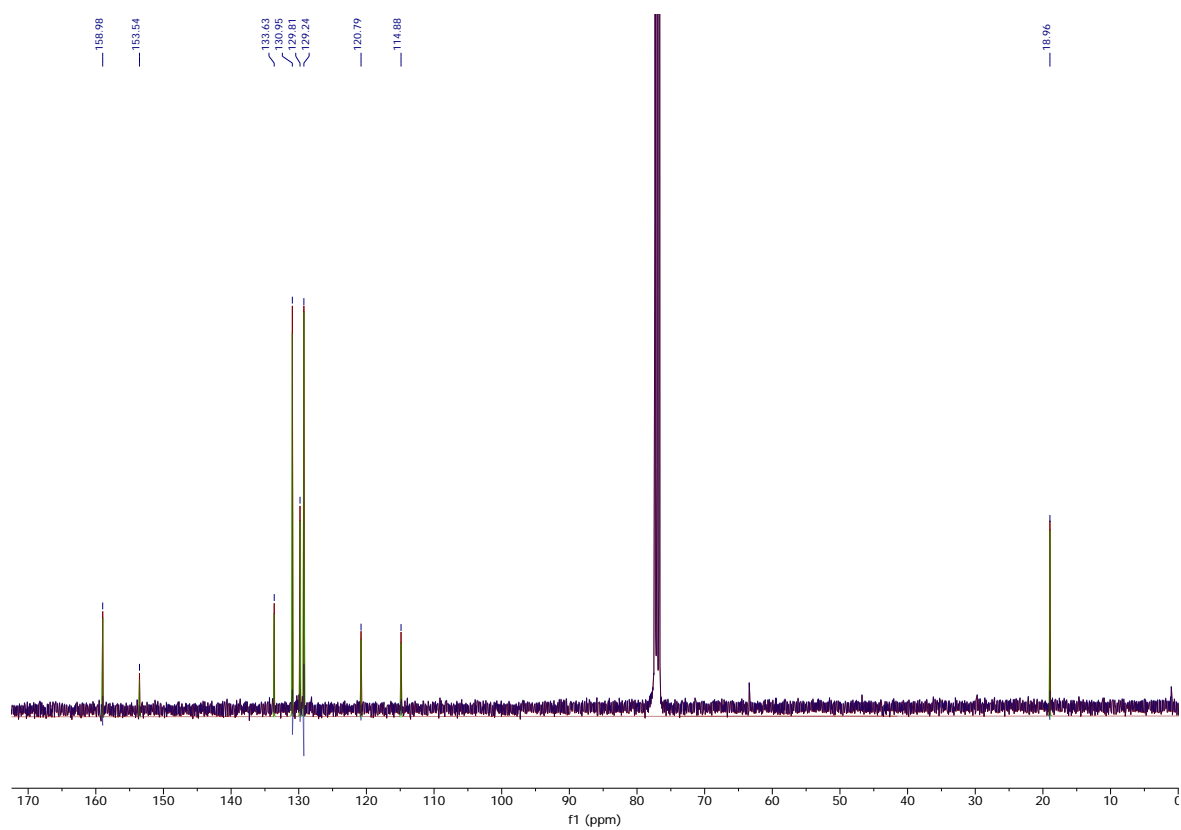

Figure S4. <sup>13</sup>C NMR spectrum of **2**.

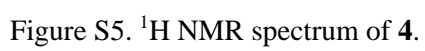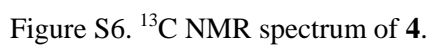

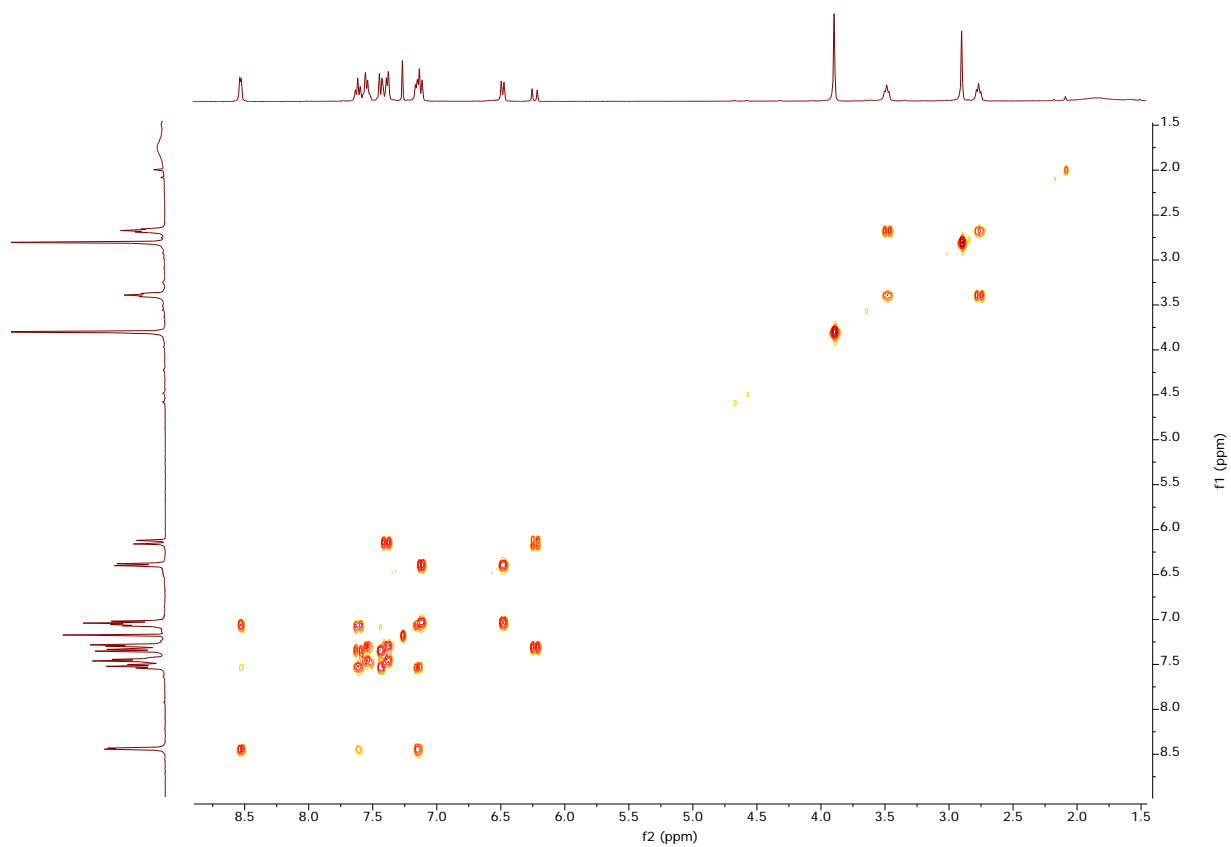

Figure S7.  $^1\text{H}$ - $^1\text{H}$  COSY NMR spectrum of **4**.

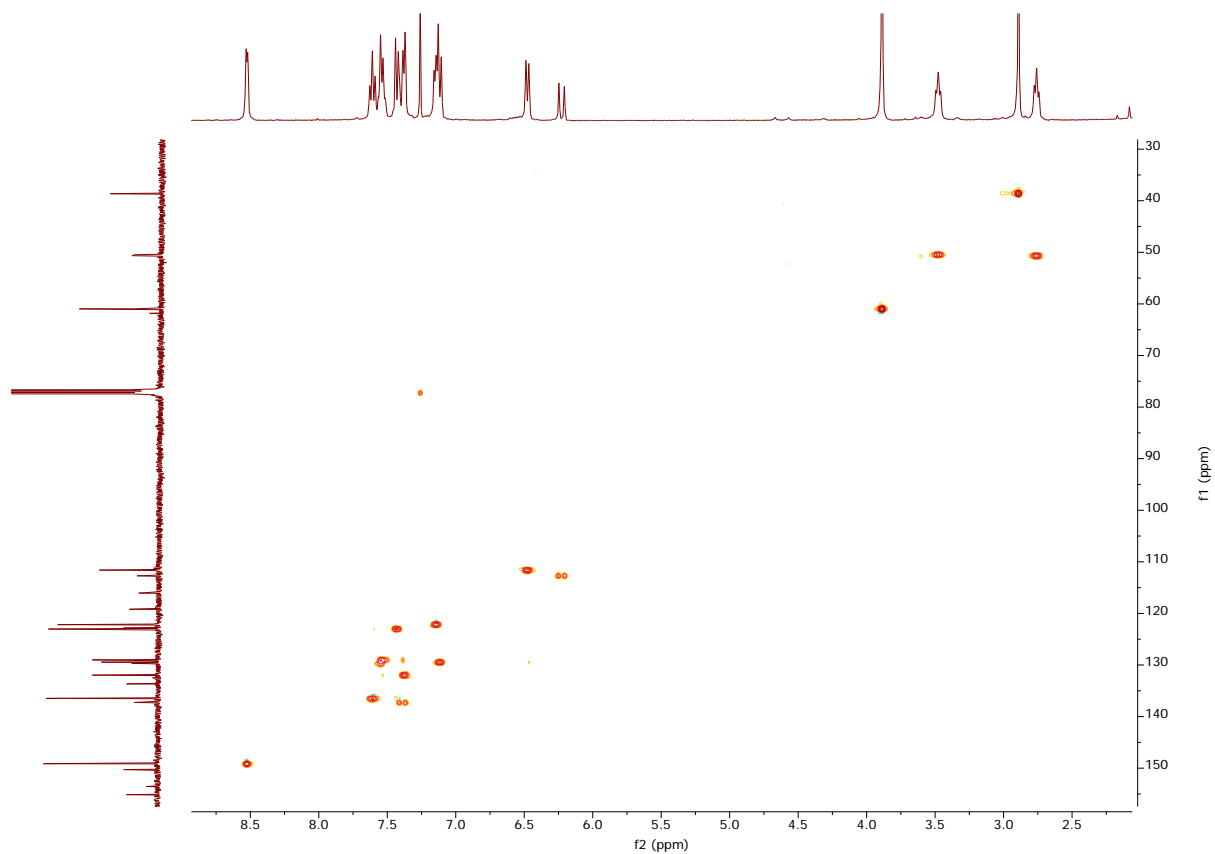

Figure S8.  $^1\text{H}$ - $^{13}\text{C}$  HSQC NMR spectrum of **4**.

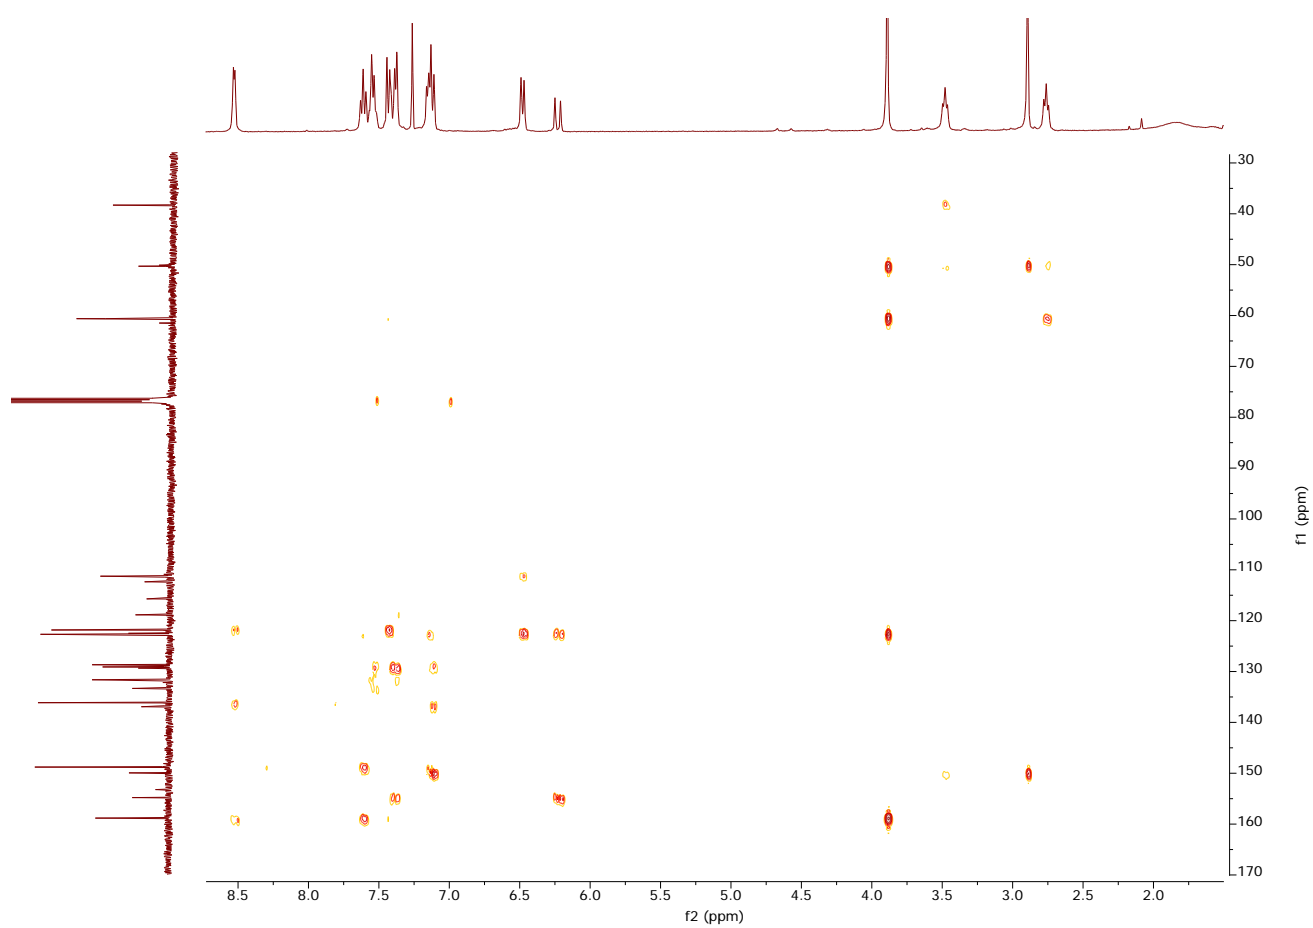

Figure S9.  $^1\text{H}$ - $^{13}\text{C}$  HMBC NMR spectrum of **4**.

Table S1 – Full NMR peak assignment for chemosensor **4**.

| Position | <sup>1</sup> H | <sup>13</sup> C |
|----------|----------------|-----------------|
| 1        | -              | 116.06          |
| 2        | -              | 153.56          |
| 3        | -              | 119.20          |
| 4        | -              | 133.67          |
| 5        | 7.38           | 131.96          |
| 6        | 7.53           | 129.01          |
| 7        | 7.55           | 129.67          |
| 8        | 7.53           | 129.01          |
| 9        | 7.38           | 131.96          |
| 10       | -              | 122.97          |
| 11       | 6.22           | 112.71          |
| 12       | 7.39           | 137.26          |
| 13       | -              | 155.13          |
| 14       | 7.12           | 129.44          |
| 15       | 6.48           | 111.60          |
| 16       | -              | 150.27          |
| 17       | 6.48           | 111.60          |
| 18       | 7.12           | 129.44          |
| 19       | 2.89           | 38.64           |
| 20       | 3.48           | 50.65           |
| 21       | 2.76           | 50.47           |
| 22       | 3.89           | 60.97           |
| 23       | -              | 159.16          |
| 24       | 8.53           | 149.15          |
| 25       | 7.15           | 122.17          |
| 26       | 7.61           | 136.47          |
| 27       | 7.43           | 123.02          |

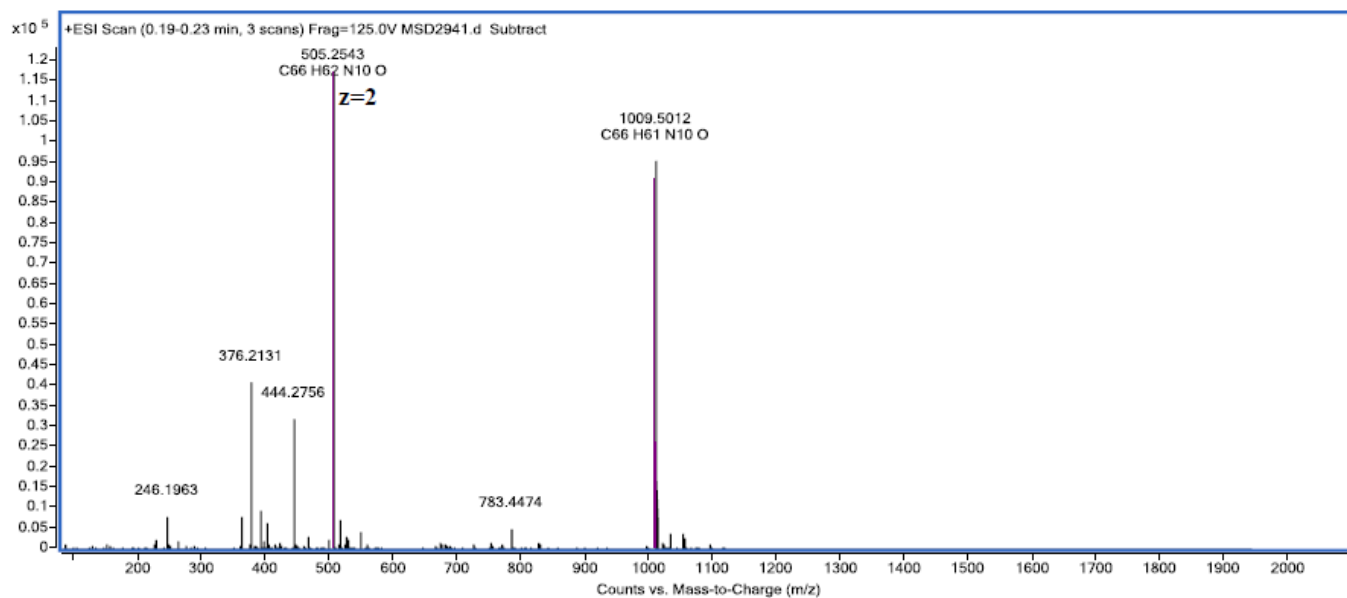

Figure S10. HRMS spectrum of **4**.

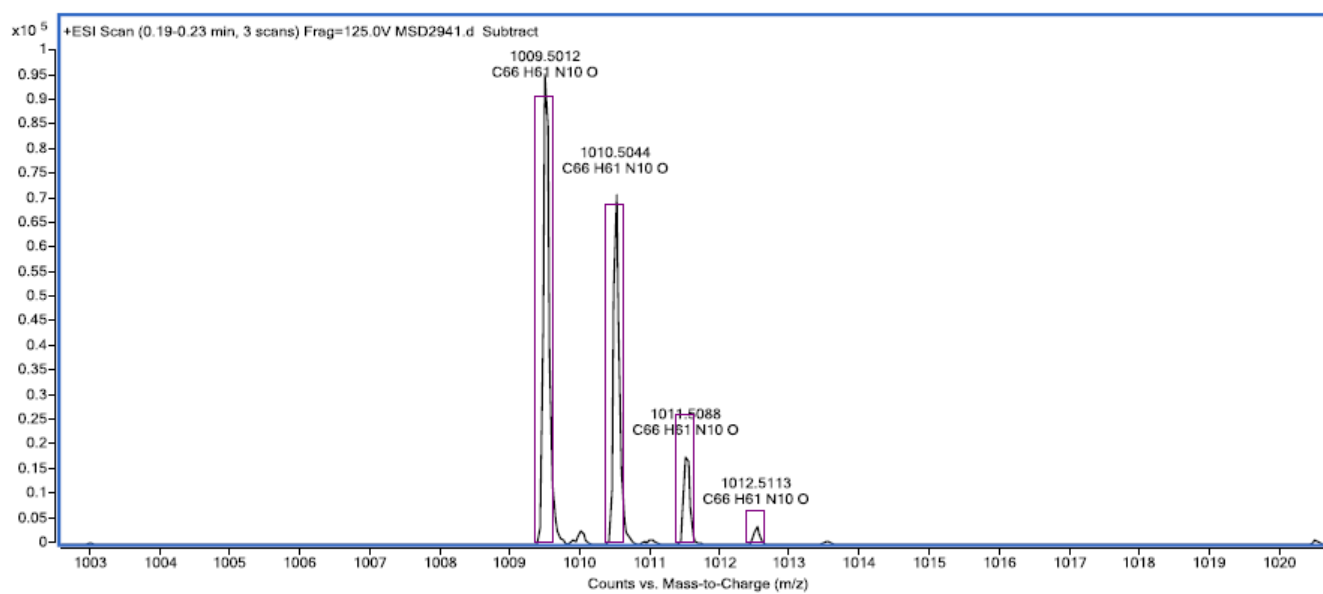

Figure S11. Zoom of the molecular ion peak from HRMS spectrum of **4**.



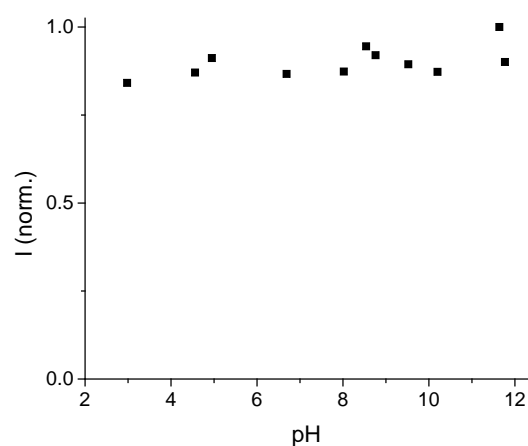

Figure S12. pH dependence of fluorescence emission of **4**, in a mixture of 50% MeOH (1.5mL) and 50% diluted Theorell and Stenhagen buffer [24] (0.5 mL buffer in 1.5 mL of water content). [**4**] = 2.5  $\mu$ M,  $\lambda_{\text{exc}}$  (**4**) = 500 nm.

Table S2 – Stokes shift from chemosensor **4** in different organic solvents, and their corresponding empiric polarity parameters.

| Solvent         | Stokes shift ( $\text{cm}^{-1}$ ) | $E_T^N$ * |
|-----------------|-----------------------------------|-----------|
| Toluene         | 4121                              | 0.099     |
| Diethylether    | 4383                              | 0.117     |
| Tetrahydrofuran | 4905                              | 0.207     |
| Ethyl acetate   | 5000                              | 0.228     |
| Dichloromethane | 5399                              | 0.309     |
| Acetonitrile    | 6734                              | 0.46      |

\*From reference 28.

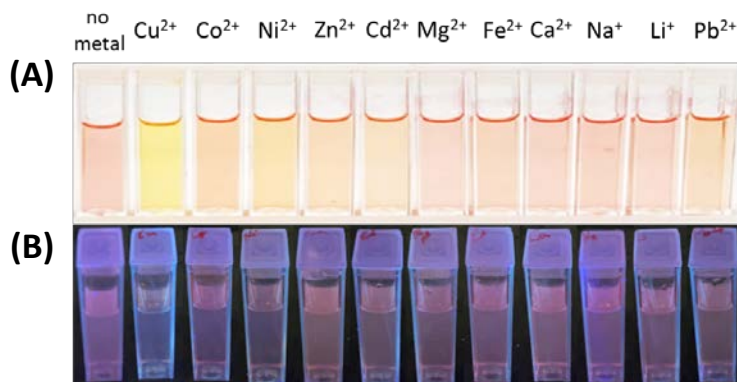

Figure S13. Naked-eye changes in chemosensor **4** (10  $\mu$ M), in a 50:50 mixture of methanol and 0.01M HEPES buffer at pH=7.1 ( $\lambda_{\text{exc}}$  = 500 nm), with different metal ions (2 equivalents): (A) on ambient light; (B) under UV light irradiation (365 nm).
